1                   **Exploring the Extreme Acid Tolerance of a Dynamic Protein Nanocage**

2

3                   Jesse A. Jones<sup>1</sup>, Michael P. Andreas<sup>1</sup>, and Tobias W. Giessen<sup>1,2\*</sup>

4                   <sup>1</sup>Department of Biological Chemistry, University of Michigan Medical School, Ann Arbor, MI, USA

5                   <sup>2</sup>Department of Biomedical Engineering, University of Michigan Medical School, Ann Arbor, MI, USA

6                   \*correspondence: [tgiessen@umich.edu](mailto:tgiessen@umich.edu)

7 **Abstract**

8 Encapsulins are protein nanocages capable of efficient self-assembly and cargo enzyme encapsulation.  
9 They are found in a wide variety of bacteria and archaea, including many extremophiles, and are  
10 involved in iron and sulfur homeostasis, oxidative stress resistance, and secondary metabolite  
11 production. Resistance against physicochemical extremes like high temperature and low pH is a key  
12 adaptation of many extremophiles and also represents a highly desirable feature for many  
13 biotechnological applications. However, no systematic characterization of acid stable encapsulins has  
14 been carried out, while the influence of pH on encapsulin shells has so far not been thoroughly explored.  
15 Here, we report on a newly identified encapsulin nanocage (AaEnc) from the acid-tolerant bacterium  
16 *Acidipropionibacterium acidipropionici*. Using transmission electron microscopy, dynamic light  
17 scattering, and proteolytic assays, we demonstrate its extreme acid tolerance and resilience against  
18 proteases. We structurally characterize the novel nanocage using cryo-electron microscopy, revealing a  
19 dynamic five-fold pore that displays distinct “closed” and “open” states at neutral pH, but only a singular  
20 “closed” state under strongly acidic conditions. Further, the “open” state exhibits the largest pore in an  
21 encapsulin shell reported to date. Non-native protein encapsulation capabilities are demonstrated, and  
22 the influence of external pH on internalized cargo is explored. AaEnc is the first characterized highly acid  
23 stable encapsulin with a unique pH-dependent dynamic pore and its molecular characterization provides  
24 novel mechanistic details underlying the pH stability of large dynamic protein complexes.

25

26

27

28

29

30

31

## 32 Introduction

33 Protein-based compartments are used by many prokaryotes to regulate and optimize their metabolism  
34 in space and time.<sup>1</sup> One of the most widespread families of microbial protein compartments are  
35 encapsulins. Structurally, encapsulins self-assemble from a single type of HK97 phage-like shell protein  
36 to form icosahedral nanocages.<sup>2</sup> Encapsulins can exhibit different triangulation numbers, T=1 (60mer,  
37 ca. 24 nm), T=3 (180mer, ca. 32 nm), and T=4 (240mer, ca. 42 nm), with pores of varying sizes located at  
38 the 5-, 3-, and 2-fold symmetry axes.<sup>3,4</sup> They are classified into four distinct families, with Family 1 being  
39 the first discovered and most studied,<sup>4</sup> and derive their name from their ability to encapsulate specific  
40 co-regulated cargo enzymes. In Family 1, encapsulation is mediated by conserved peptide sequences  
41 found at the C-terminus of all cargo proteins called targeting peptides (TPs).<sup>5</sup> This feature allows  
42 encapsulins to perform a variety of biological functions, such as to act as sequestration chambers for  
43 dye-decolorizing peroxidases (DyPs), involved in combating oxidative stress;<sup>5,6</sup> to serve as iron  
44 mineralization and storage compartments;<sup>7-10</sup> as well as to sequester desulfurase enzymes, likely  
45 involved in sulfur metabolism.<sup>11</sup>

46 Due to their favorable properties, encapsulins have gained much attention as bioengineering tools.<sup>3,12,13</sup>  
47 As such, engineered encapsulins have been used in bacteria, yeast, and human cells for various  
48 applications, including as metabolic nanoreactors,<sup>14</sup> cellular imaging systems,<sup>13</sup> and drug delivery  
49 platforms.<sup>15,16</sup> A recent increase in the number of studies on encapsulin systems highlights the  
50 expanding scope of the field.<sup>2,4,10,11,17</sup> The encapsulin shell in particular has received substantial attention  
51 in recent years.<sup>17</sup> Efforts aimed at increasing shell stability,<sup>15</sup> controlling shell assembly,<sup>18</sup> and  
52 modulating pore size and dynamics have recently been reported.<sup>19,20</sup> Encapsulin shells efficiently self-  
53 assemble under many conditions and display marked resistance against chemical or temperature  
54 denaturation, pH, and non-specific proteases. For example, the melting temperature of the T=4 shell  
55 from *Quasibacillus thermotolerans* was reported to be nearly 87°C,<sup>10</sup> while the encapsulin from  
56 *Brevibacterium linens* was shown to be stable across a broad range of pH values (pH 5 to 11).<sup>21</sup> However,  
57 a number of biotechnological and industrial processes – including lignocellulose hydrolysis for biofuel  
58 production,<sup>22</sup> breakdown of complex sugars for monosaccharide production,<sup>22</sup> and bioleaching to  
59 prevent metal contamination and enable bioremediation in the mining industry<sup>23,24</sup> – would benefit  
60 from modular protein cages stable at acidic conditions below pH 5. Even though evolutionary  
61 adaptations of thermostable proteins have been well characterized and include oligomerization, large  
62 hydrophobic cores, and disulfide bond formation, adaptations that lead to acid-stable proteins are  
63 poorly understood.<sup>25,26</sup>

64 Here, we carry out the first bioinformatic search for acid-stable encapsulin nanocages and subsequently  
65 characterize the structure and stability of a Family 1 encapsulin shell from *Acidipropionibacterium*  
66 *acidipropionici* (AaEnc) – one of the top hits identified in our *in silico* analysis. Using a combination of  
67 techniques, including cryo-electron microscopy (cryo-EM), we characterize the structure and acid  
68 stability of the AaEnc nanocage across a wide range of pH values. Our results highlight the acid stability  
69 of AaEnc and its resilience towards protease digestion under different pH conditions. Cryo-EM analysis  
70 reveals a pH-dependent dynamic 5-fold pore with defined “closed” and “open” states, with the latter

71 representing the largest pore in an encapsulin shell reported to date. Further analyses confirm the non-  
72 native cargo loading capabilities of AaEnc and reveal the effects of external pH on internalized cargo.

73

## 74 **Results and Discussion**

### 75 Bioinformatic search for acid-tolerant encapsulin shells

76 Only Family 1 encapsulins have so far been used as engineering platforms as they are the most studied  
77 and well-understood of the different types of encapsulins – especially with respect to non-native cargo  
78 loading. Therefore, with future engineering applications in mind, we chose to focus our bioinformatic  
79 search for acid-tolerant shells on Family 1.<sup>3,4,27,28</sup> Further arguments for focusing on Family 1 are that the  
80 widespread DyP encapsulins found in Family 1 are known to optimally function under acidic conditions<sup>29</sup>  
81 while a variety of Family 1 systems encoded by acid-tolerant and acidophilic bacteria have already been  
82 previously identified.<sup>4</sup>

83 As acid-tolerant proteins generally possess a low calculated isoelectric point (pI) caused by a large  
84 number of surface-exposed negatively charged residues,<sup>22,25,26,30</sup> it was hypothesized that encapsulins  
85 with a low pI may exhibit increased acid tolerance. Therefore, the large set of previously identified  
86 Family 1 encapsulins with molecular weights between 26 and 35 kDa – the size range of non-cargo fused  
87 encapsulins – were ranked by pI (**Figure 1a**, **Figure 1b**, and **Supplementary Data 1**). The lowest observed  
88 pIs ranged from 4.14 to 4.49 with one protein found in the pI bin centered at a pI of 4.2 and 28 proteins  
89 found in the pI bin centered at a pI of 4.4. Of these encapsulins, 18 are encoded by halophiles, four by  
90 acidophiles or acid-tolerant bacteria, and the rest by soil bacteria or putative pathogens (**Table S1**).

91 We chose to focus on an encapsulin encoded by one of the acid-tolerant species, namely, the DyP  
92 system of the industrially relevant *A. acidipropionici* (ATCC 4875) (AaEnc; **Figure 1c**, **Table S1**, and **Figure**  
93 **S1**). *A. acidipropionici* is a Gram-positive actinobacterium able to tolerate acidic conditions as low as pH  
94 4.4.<sup>31</sup> It is used in agricultural applications and studied for its biotechnological and industrial potential  
95 due to its production of propionic acid as a primary fermentation product, with acetic acid and carbon  
96 dioxide as secondary products.<sup>31-33</sup>

97 The pI and sequence composition of AaEnc was compared to previously characterized encapsulin shells,  
98 including those from *Mycobacterium smegmatis*, *Brevibacterium linens*, *Mycolicibacterium hassiacum*,  
99 *Haliangium ochraceum*,<sup>34</sup> *Thermotoga maritima*, and *Myxococcus xanthus* (**Figure 1**, **Figure S1**, **Table 1**,  
100 and **Table S1**).<sup>2,7,21,35,36</sup> AaEnc was found to have a lower pI than all of the so far characterized Family 1  
101 encapsulins, and to display the largest ratio of acidic to basic residues (**Table 1** and **Table S1**). This makes  
102 AaEnc a promising test system for exploring the acid stability of encapsulin shells.

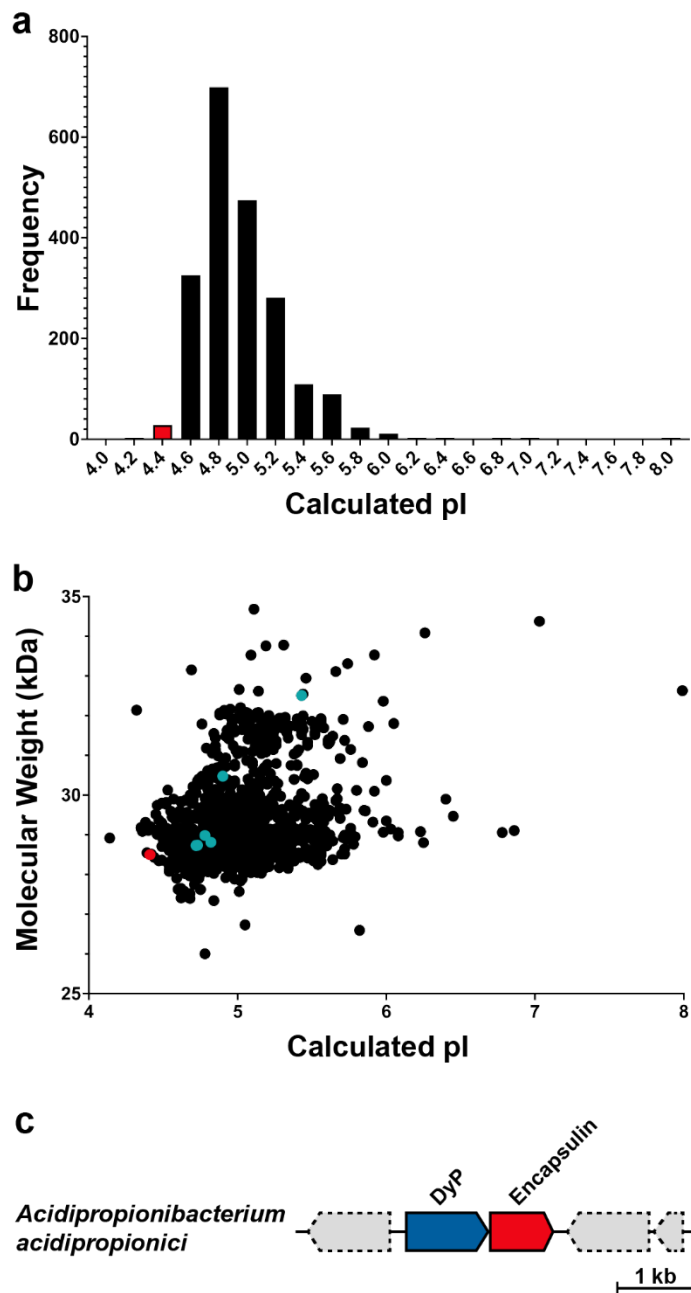

103  
 104 **Figure 1.** Bioinformatic analysis of Family 1 encapsulins. **a)** Histogram of encapsulins based on calculated isoelectric point (pI),  
 105 binned at 0.2 pH units. The pI bin of interest centered at pI 4.4 and containing the *A. acidipropionici* encapsulin (AaEnc) is  
 106 highlighted in red. **b)** Scatter plot of encapsulins based on calculated pI and molecular weight (MW). AaEnc (pI: 4.41, MW: 28.5  
 107 kDa) is shown in red. Previously well-characterized encapsulins from *Mycobacterium smegmatis*, *Brevibacterium linens*,  
 108 *Mycolicibacterium hassiacum*, *Haliangium ochraceum*, *Thermotoga maritima*, and *Myxococcus xanthus* are shown in cyan. **c)**  
 109 The *A. acidipropionici* Family 1 encapsulin operon containing a dye-decolorizing peroxidase (DyP) cargo enzyme (blue) and  
 110 encapsulin shell (AaEnc, red). Functionally unrelated genes are shown in gray with dashed outlines. Scale bar: 1 kilobase (kb).

111

112

113 **Table 1.** Comparison of the pI and charge of AaEnc and other characterized encapsulins.

| Encapsulin                | pI <sup>1</sup> | # Acidic residues | # Basic residues | Acid/base ratio | Charge at pH 7.0 <sup>2</sup> |
|---------------------------|-----------------|-------------------|------------------|-----------------|-------------------------------|
| <i>A. acidipropionici</i> | 4.41            | 41                | 25               | 1.64            | -23.47                        |
| <i>M. smegmatis</i>       | 4.72            | 41                | 31               | 1.32            | -16.44                        |
| <i>B. linens</i>          | 4.73            | 40                | 30               | 1.33            | -18.77                        |
| <i>M. hassiacum</i>       | 4.78            | 41                | 32               | 1.28            | -15.50                        |
| <i>H. ochraceum</i>       | 4.82            | 40                | 32               | 1.25            | -13.47                        |
| <i>T. maritima</i>        | 4.90            | 50                | 39               | 1.28            | -13.05                        |
| <i>M. xanthus</i>         | 5.45            | 37                | 36               | 1.03            | -7.50                         |

114 <sup>1</sup> Theoretical isoelectric points calculated with ExPASy Compute pI/MW tool ([https://web.expasy.org/compute\\_pi/](https://web.expasy.org/compute_pi/)).

115 <sup>2</sup> Charges at pH 7.0 calculated via Geneious Prime 2020.2.4 (<https://www.geneious.com>).

### 116 Biophysical analysis of the AaEnc protein nanocage

117 To characterize the AaEnc nanocage, it was first heterologously expressed in *Escherichia coli* and then  
118 purified via a combination of polyethylene glycol (PEG) precipitation, anion exchange chromatography  
119 (IEC), and size exclusion chromatography (SEC), with the latter serving as an initial verification that the  
120 nanocage was assembled at pH 7.5 (**Figure 2a**). Aliquots of the purified sample were then exchanged  
121 into various buffers across a wide range of pH values (pH 1.5 to 10.0) while holding the salt  
122 concentration constant at a physiological value of 150 mM NaCl. After incubation for 6 h, samples were  
123 imaged via negative stain transmission electron microscopy (TEM) to assess the effect of pH on protein  
124 aggregation and the assembly state of the AaEnc nanocage. Some assembled AaEnc shells could be  
125 observed at pH values as low as 1.9 and as high as 7.5 (**Figure S2**). However, the pH range within which  
126 AaEnc was close to fully assembled with only minor aggregation occurring was between pH 2.25 and 7.5.  
127 Therefore, subsequent biophysical analyses were carried out at four pH values spanning this pH range,  
128 namely at pH 2.25, 3.0, 5.0, and 7.5. Dynamic light scattering (DLS) analyses and negative stain TEM  
129 indicated that AaEnc maintained a similar size and appearance across all four tested conditions with Z-  
130 average diameters of 30.3 nm at pH 2.25, 30.2 nm at pH 3.0, 29.8 nm at pH 5.0, and 24.4 nm at pH 7.5  
131 (**Figure 2b** and **Figure 2c**). The slight increase in average diameter at acidic pH values is likely due to  
132 limited aggregation under these conditions, however, as can be seen in TEM micrographs, individual  
133 shells at all tested pH values exhibited diameters of ca. 24 nm. Static light scattering (SLS) further  
134 indicated that AaEnc is relatively stable across all tested pH values, with aggregation temperatures ( $T_{agg}$ )  
135 of 36.0°C at pH 2.25, 38.3°C at pH 3.0, 39.3°C at pH 5.0, and 62.4°C at pH 7.5 (**Figure 2d**). However, a  
136 clear trend can be observed with lower pH values leading to decreased  $T_{agg}$  values. We next explored the  
137 resistance of AaEnc against proteolytic degradation at various pH values. AaEnc proved to be relatively  
138 resilient to pepsin degradation at pH 3.0 and 37°C during a 3 h incubation period, whereas the control  
139 protein, bovine serum albumin (BSA), was completely degraded under the same conditions (**Figure 2e**).  
140 Similarly, AaEnc was relatively resistant to degradation by trypsin and chymotrypsin at pH 7.5 and 37°C  
141 over an 8 h period, with BSA being again substantially degraded under the same conditions (**Figure 2f**).  
142 Overall, these results highlight the substantial acid stability of AaEnc which is significantly higher than  
143 that of any other previously characterized encapsulin.

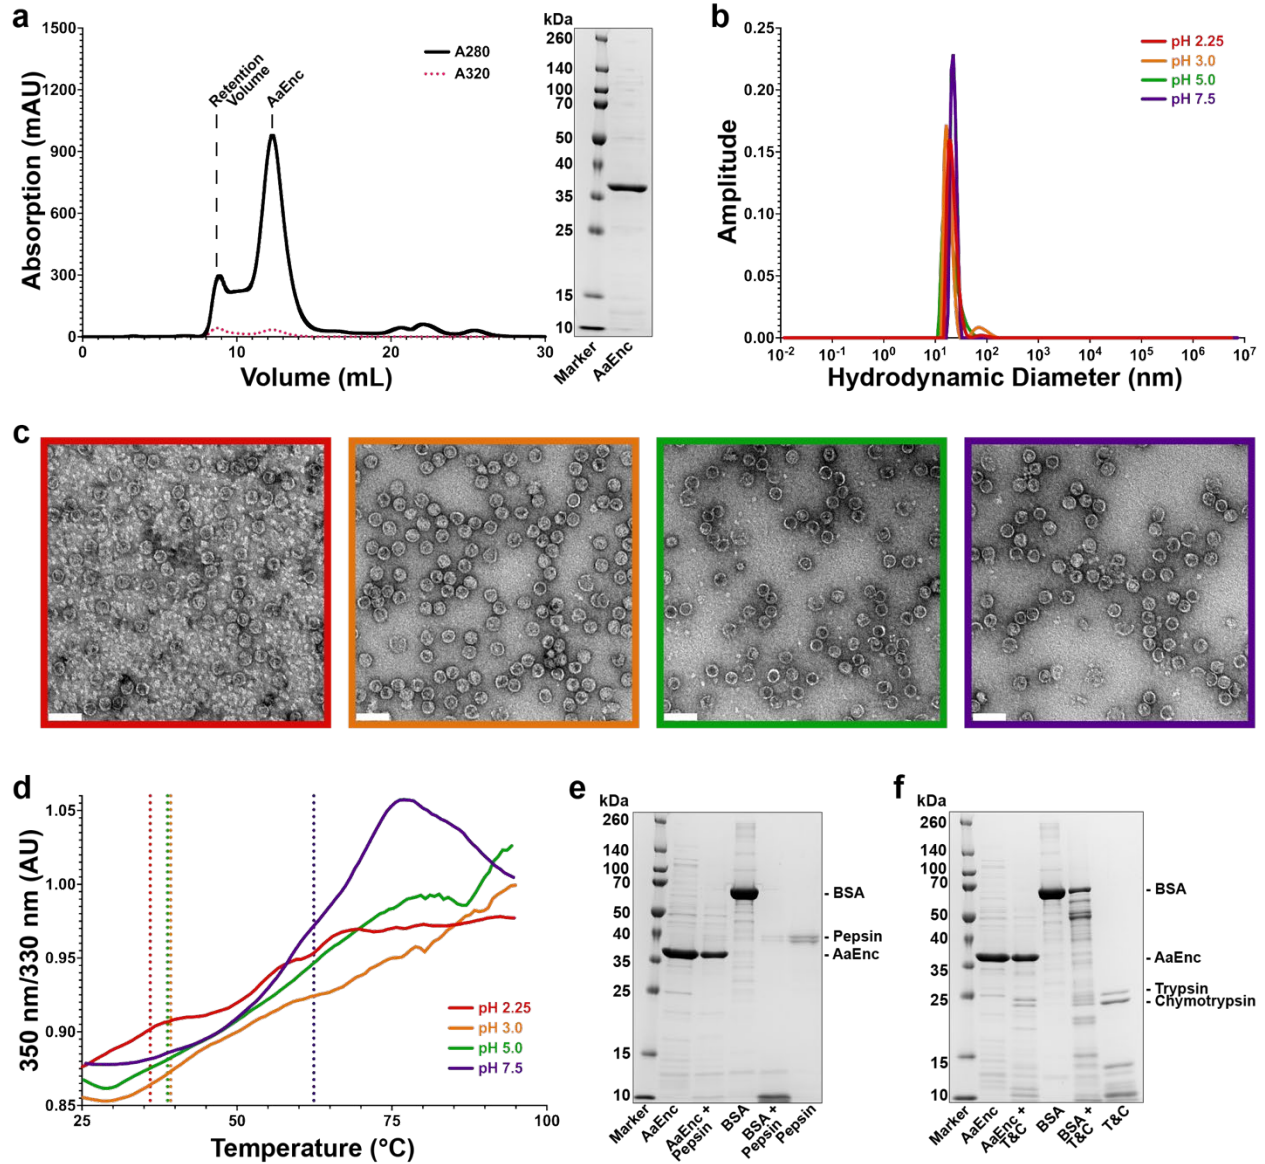

144

145 **Figure 2.** Biophysical analysis of the AaEnc nanocage. **A)** Size exclusion chromatography (SEC) of the AaEnc nanocage depicting  
 146 elution at 12 mL suggestive of an assembled T=1 encapsulin (left), along with SDS-PAGE analysis of purified AaEnc (right). **B)**  
 147 Dynamic light scattering (DLS) analysis of AaEnc at pH 7.5 (purple), pH 5.0 (green), pH 3.0 (orange), and pH 2.25 (red). **C)**  
 148 Transmission electron microscopy (TEM) analysis of AaEnc after 6 h incubation at different pH values: pH 2.25 (red, far left), pH  
 149 3.0 (orange, middle left), pH 5.0 (green, middle right), and pH 7.5 (purple, far right). Scale bars: 50 nm. **D)** Representative  
 150 thermal unfolding curves for AaEnc at different pH values: pH 2.25 (red), pH 3.0 (orange), pH 5.0 (green), and pH 7.5 (purple)  
 151 with corresponding aggregation temperatures (T<sub>agg</sub>, vertical dashed lines, respective colors). **e)** Protease stability analysis of  
 152 AaEnc exposed to pepsin at pH 3.0 for 3 h with bovine serum albumin (BSA) as a control. **f)** Protease stability analysis of AaEnc  
 153 exposed to trypsin and chymotrypsin (T&C) at pH 7.5 for 8 h with BSA as a control.

## 154 Structural characterization of the AaEnc protein nanocage

155 To further characterize the influence of pH on AaEnc, single particle cryo-EM analysis was carried out,  
 156 initially at a physiological pH of 7.5. Results revealed the existence of two discrete structural states  
 157 distinguished by an either all “closed” or all “open” conformation of the 5-fold pores within the AaEnc

158 shell (**Figure 3** and **Supplementary Video 1**). The “closed” and “open” states were determined to 2.90  
159 (29,056 particles) and 3.32 Å (13,581 particles), respectively (**Figure S3**). About 68% of the used particles  
160 comprise the “closed” state while about 32% exhibit an “open” state. The shell for both states consists  
161 of 60 AaEnc protomers, forming a ca. 1.7 MDa, T=1 icosahedral protein cage with a diameter of 24 nm  
162 and an overall negatively charged exterior surface (**Figure 3a** and **Figure 3c**). Symmetric (icosahedral, I)  
163 and asymmetric (C1) refinements were carried out for both states to investigate if a given pore can be  
164 “closed” or “open” independently of the other pores in the same shell or if all pore states are generally  
165 correlated. Both I and C1 refinements yielded similar all “closed” and all “open” states (**Figure S3**), thus  
166 confirming that under the given experimental conditions, the pore dynamics of all pentameric facets  
167 within a shell appear to be strongly correlated. However, this does not necessarily exclude the possibility  
168 that, under certain environmental conditions or in the presence of cargo, a single shell can contain both  
169 “closed” and “open” 5-fold pores at the same time. This phenomenon – independent dynamic 5-fold  
170 pores – has indeed been observed for the Family 1 encapsulin from *H. ochraceum* (**Figure S4**).<sup>37</sup> To  
171 further analyze 5-fold pore dynamics, 3D variability analysis with three components was carried out in  
172 cryoSPARC for both datasets, however, no states could be resolved that would indicate the  
173 simultaneous presence of both “closed” and “open” pores within the shell. The 5-fold pore diameters in  
174 the AaEnc nanocage are 5 Å for the “closed” and 20 Å for the “open” state (**Figure 3b**, **Figure 3d**, and  
175 **Figure S3**). Thus, the AaEnc “open” state represents the largest pore found in an encapsulin shell to  
176 date, substantially larger than the previously reported dynamic *H. ochraceum* pore which exhibited an  
177 “open” state diameter of 15 Å.<sup>37</sup>

178 Detailed examination of the “closed” and “open” state structures indicates that the primary  
179 conformational changes underlying the dynamic nature of the AaEnc pore are located at the apex of the  
180 so-called axial domain (A-domain) of the encapsulin protomer (**Figure 4a**). In addition, an overall  
181 backwards tilt of the “open” state protomer by 10° (**Figure 3b** and **Figure 3d**) also contributes to the  
182 observed size increase of the 5-fold pore (**Figure 3c**, **Figure 3d**, **Supplementary Video 2**). In the “closed”  
183 state, five pore residues – Asp185, His186, Gly187, Val188, and Pro189 – form a short loop between the  
184  $\alpha_6$  and  $\alpha_7$  helices encompassing a predicted  $\alpha$ -turn (**Figure S5**); whereas in the “open” state, the same  
185 residues form a tighter turn that loses the predicted  $\alpha$ -turn conformation, with Val188 and Pro189  
186 becoming part of and extending the  $\alpha_7$  helix (**Figure 4c**, **Figure S5**, and **Figure S6**).<sup>38</sup> His186 undergoes  
187 the most readily observable conformational change. It is located at the apex of the A-domain in the  
188 “closed” state, yet partially buried between two adjacent protomers in the “open” state (**Figure 4b**,  
189 **Figure 4c**). Furthermore, in the “open” state, intermolecular hydrogen bonding is observed between  
190 His186 and Asp150 as well as Ser181 and Asn157 of adjacent protomers (**Figure 4c**). These two  
191 hydrogen bonds are notably absent in the “closed” state. His186 is not strictly conserved among other  
192 structurally characterized Family 1 encapsulins (**Figure S1**) and cannot be used alone as an indicator for  
193 the presence of dynamic 5-fold pores in encapsulin shells, as in the *H. ochraceum* encapsulin, which also  
194 displays “closed” and “open” pore states, where His186 is substituted with Asp186 (**Figure S1** and **Figure**  
195 **S4**). Interestingly, in *H. ochraceum* the residue corresponding to Asp150 in AaEnc is Arg150. This could  
196 indicate that analogous to the hydrogen bonding between His186 and Asp150 (AaEnc), bonding  
197 between Asp186 and Arg150 (*H. ochraceum*), with swapped H-bond donors/acceptors, may be possible  
198 under certain conditions. However, this was not observed in the *H. ochraceum* “open” conformation.



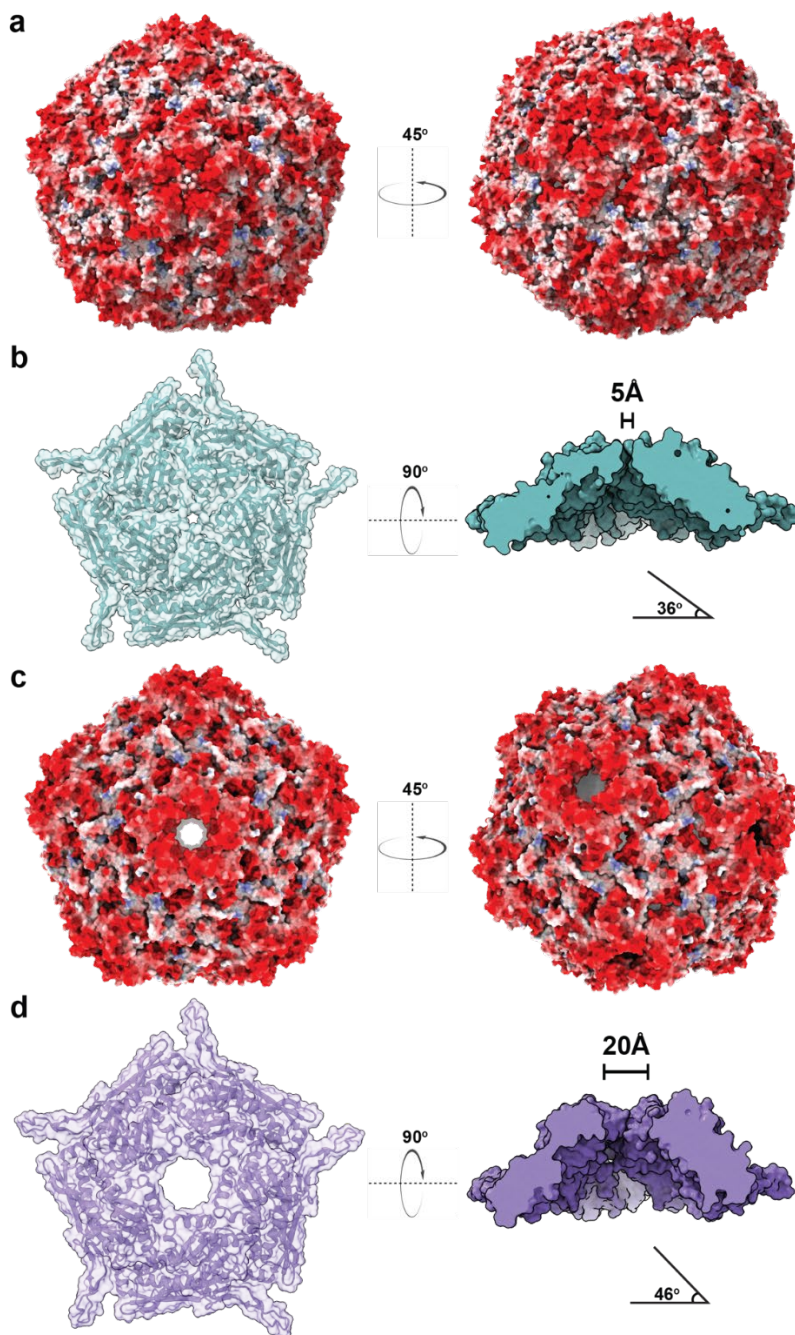

199

200 **Figure 3.** Structural overview of the AaEnc nanocage and 5-fold pore. **a)** Electrostatic surface representation of AaEnc in the  
201 "closed" conformation viewed down the 5-fold symmetry axis as well as at a 45° rightward turn (red, negative charge; white,  
202 neutral; blue, positive charge). **b)** Top-down ribbon and partially transparent surface representation of the "closed" AaEnc  
203 pentamer (left; cyan) and solid surface representation rotated 90° and viewed through the frontal axis plane to highlight pore  
204 size (right). The angle between protomers and the orthogonal of the 5-fold axis is highlighted. **c)** Electrostatic surface  
205 representation of AaEnc in the "open" conformation. **d)** Top-down ribbon and partially transparent surface representation of  
206 the "open" AaEnc pentamer (left; purple) and solid surface representation rotated 90° and viewed through the frontal axis  
207 plane to highlight pore size (right). The angle between protomers and the orthogonal of the 5-fold axis is highlighted.

208 Overall, the cryo-EM density for the loop region of the *H. ochraceum* encapsulin in the “open”  
209 conformation was not well defined, whereas for AaEnc, both “closed” and “open” states exhibit strong  
210 and well-defined densities (**Figure S6**). This could in part be due to the additional stabilization of the  
211 “open” state in AaEnc resulting from the hydrogen bonding observed between His186 and Asp150.

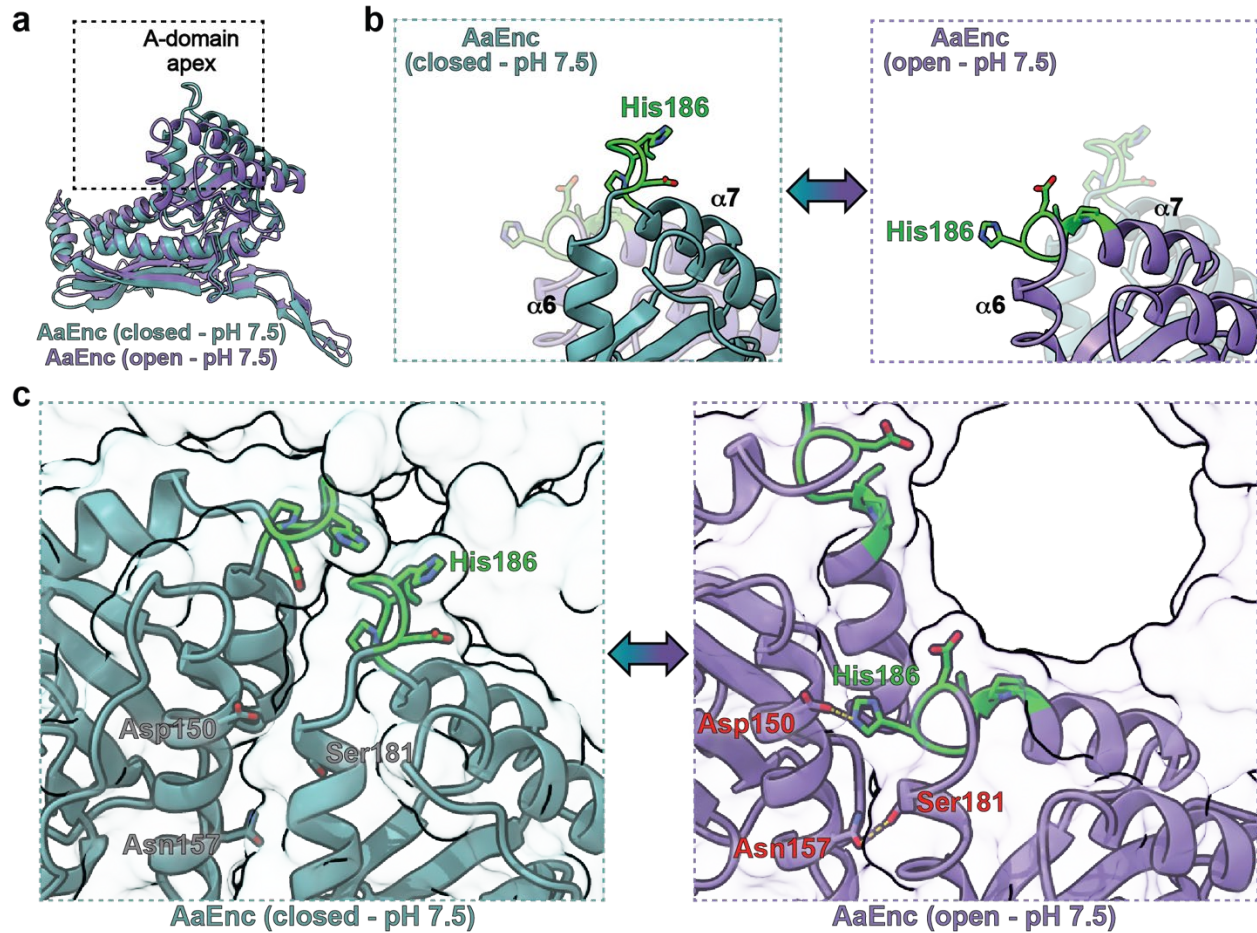

212

213 **Figure 4.** Detailed structural analysis of the AaEnc 5-fold pore. **a**) Aligned and overlaid ribbon representation of the “closed”  
214 (cyan) and “open” (purple) AaEnc protomers with dashed box highlighting the A-domain. **b**) Magnified ribbon representation  
215 juxtaposing the dynamic A-domain of the “closed” (cyan; left, solid; right, transparent) and “open” (purple; right, solid; left,  
216 transparent) AaEnc protomer, with the loop residues of interest—Asp185, His186 (labeled), Gly187, Val188, and Pro189—  
217 highlighted (green). **c**) Magnified solid ribbon representation of two adjacent AaEnc A-domains with transparent surface  
218 representation of the AaEnc pentamer highlighting the 5-fold pore. The “closed” state (left, cyan) exhibits a lack of hydrogen  
219 bonds between Asp150 (gray) and His186 (green) as well as Asn157 (gray) with Ser181 (gray), while the “open” state (right,  
220 purple) showcases gained hydrogen bonds between Asp150 (red) with His186 (green), as well as Asn157 (red) with Ser181  
221 (red).

222 Additional cryo-EM experiments were carried out at pH 3.0 to assess the structure of AaEnc under  
223 strongly acidic conditions. At pH 3.0, only a single “closed” conformational state was observed and was  
224 determined to 2.77 Å resolution (47,164 particles) (**Figure S7** and **Table S3**). It was also found that both  
225 of the “closed” AaEnc states – at pH 7.5 and pH 3.0 – are seemingly identical, with a root-mean-square  
226 deviation (RMSD) of 0.32 between the two aligned protomers (**Figure S8**).<sup>39</sup>

227 *In silico* analyses were conducted using the APBS-PDB2PQR software suite to quantitatively assess the  
228 hydrogen bonding and solvent exposure of the His186 and Asp150 residues at pH 7.5 and 3.0 (**Table 2**).<sup>40</sup>  
229 The results further corroborate that His186 is more exposed – calculated as only 10% buried – in the  
230 “closed” states, and more buried – calculated as 39% buried – in the “open” state due to the inter-  
231 protomer hydrogen bonding described above. Furthermore, no hydrogen bonds were predicted  
232 between His186 and Asp150 in either of the “closed” states, while being clearly predicted for the “open”  
233 state.

234 Based on the results outlined above the “closed” state is clearly favored at low pH. It seems likely that in  
235 addition to global protonation state changes throughout the AaEnc protomer, specifically the  
236 protonation of Asp150 at low pH would preclude any hydrogen bonding with His186, thus making the  
237 conformational change from “closed” to “open” state energetically less favorable at acidic conditions.  
238 The specific molecular and biological functions of dynamic 5-fold pores in encapsulin shells is currently  
239 unknown. However, as the native cargo of AaEnc is a DyP-type peroxidase, generally known to be  
240 optimally active at acidic pH values, the preference of the AaEnc nanocage for the “closed” pore state at  
241 low pH might have significant functional and biological implications.

242 **Table 2.** *In silico* analysis of key pore residues. Calculated buriedness, hydrogen bonds, and pKa values are shown.

| State and residue      | Buried | Sidechain Hydrogen Bond (Partner) <sup>1</sup> | Calculated pKa |
|------------------------|--------|------------------------------------------------|----------------|
| <b>Closed (pH 7.5)</b> |        |                                                |                |
| Asp150                 | 44%    | -0.57 (Gln147, intramolecular)                 | 5.63           |
| His186                 | 10%    | none                                           | 6.00           |
| <b>Open (pH 7.5)</b>   |        |                                                |                |
| Asp150                 | 12%    | -0.53 (His186, intermolecular)                 | 3.50           |
| His186                 | 39%    | 0.53 (Asp150, intermolecular)                  | 6.63           |
| <b>Closed (pH 3.0)</b> |        |                                                |                |
| Asp150                 | 43%    | 0.90 (Asp149, intramolecular)                  | 7.64           |
| His186                 | 10%    | none                                           | 5.85           |

243 <sup>1</sup> pKa shift due to respective hydrogen bond.

#### 244 Computational analysis of continuum electrostatics and solvation of the AaEnc protomer

245 To gain deeper insights into the stability of the AaEnc nanocage under acidic conditions, an array of  
246 computational analyses focused on continuum electrostatics and solvation of the AaEnc protomer was  
247 carried out. In particular, we thought to investigate if the AaEnc protomer would be predicted to show  
248 increased acid stability by itself outside the context of the encapsulin shell. The APBS-PDB2PQR software  
249 suite was used to assess the surface electrostatics of AaEnc at different pH values ranging from pH 2.0 to  
250 8.0 (**Figure 5a**).<sup>40</sup> The calculated protein electrostatics correlated well with the calculated pI of 4.41,  
251 showing a change from an overall positive surface charge below pH 4.0 to an overall negative surface  
252 charge above pH 5.0. Next, using the Protein-Sol software package, a heatmap depicting the average  
253 charge per residue based on pH and ionic strength was calculated.<sup>41</sup> The results again correlate well with  
254 the calculated pI, with a positive average charge per residue at pH 4.0 and below, and a negative  
255 average charge per residue at pH 4.5 and above, regardless of ionic strength (**Figure 5b**). To investigate if  
256 a discernible increase in folded state protein stability mediated by interactions between ionizable

257 groups might exist for the AaEnc protomer at acidic pH, further analyses using Protein-sol were carried  
 258 out (**Figure 5c**). It was found that at physiological ionic strength (150 mM), per residue energies below  
 259 pH 4.5 were positive, indicating decreased stability of the protomer fold below this pH threshold.

260 Taken together, our computational analysis of the AaEnc protomer suggests that the observed acid  
 261 stability of the AaEnc nanocage is not easily attributable to a highly stable protomer building block.  
 262 Instead, AaEnc acid stability is likely due to a complex combination of factors at the scale of the  
 263 assembled 60mer nanocage. Important factors likely include favorable inter-protomer interactions  
 264 within the context of the encapsulin shell, such as the structural dynamics and hydrogen bonding  
 265 interactions discussed above.

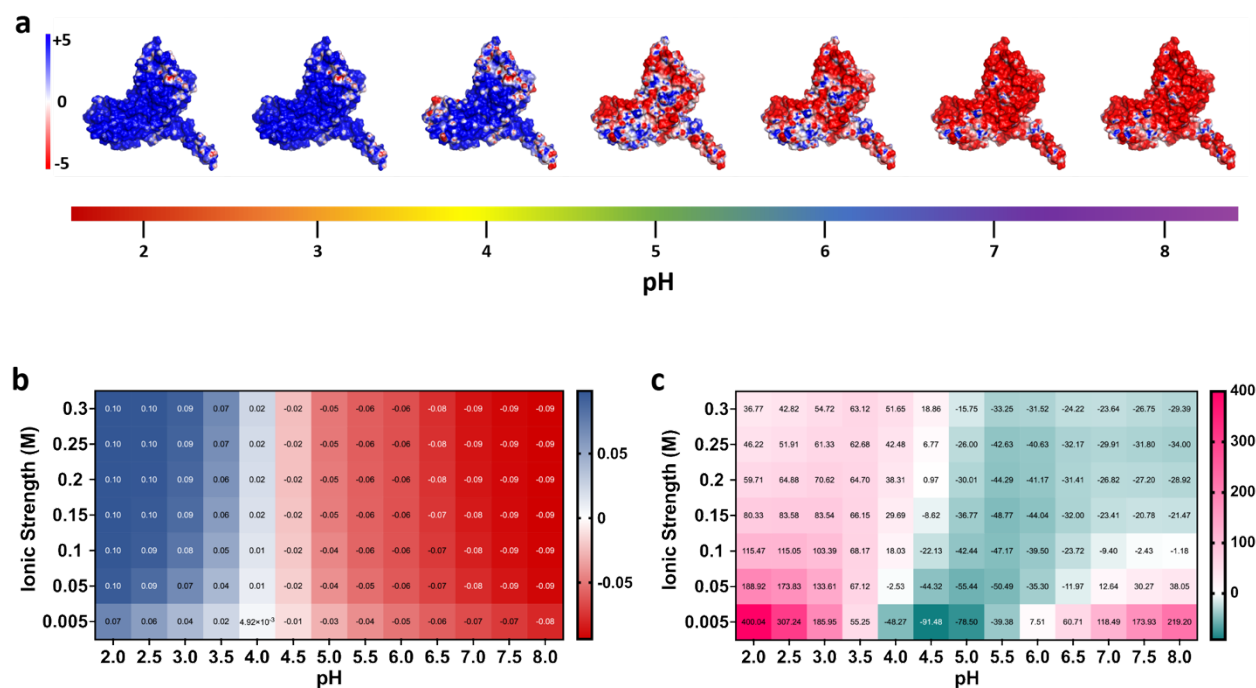

266  
 267 **Figure 5.** Computational characterization of the AaEnc protomer. **a**) Surface charge visualization of the AaEnc protomer with  
 268 amino acid protonation states calculated by pH with pdb2pqr and protein electrostatics calculated with APBS. **b**) Heatmap of  
 269 predicted average charge per residue for the AaEnc protomer at different pH and ionic strength values. **c**) Heatmap of predicted  
 270 folded state protein stability as interactions between ionizable groups in joule per residue for the AaEnc protomer at different  
 271 pH and ionic strength values.

## 272 *In vivo* cargo loading and pH effects on internalized cargo

273 To investigate if the AaEnc shell has any influence on the acid stability of internalized cargo proteins,  
 274 heterologous cargo loading experiments were carried out followed by pH screens. The predicted C-  
 275 terminal targeting peptide (TP) of the native AaEnc DyP cargo enzyme, was genetically fused to the C-  
 276 terminus of eGFP (eGFP-TP) and cloned immediately upstream of the AaEnc gene for co-expression.<sup>4,42</sup>  
 277 eGFP was chosen as a non-native cargo due to its reliable expression, favorable solubility, simple  
 278 detection, and predictable and well-reported pH sensitivity profile.<sup>43,44</sup> *In vivo* eGFP-TP cargo loading  
 279 was confirmed via its co-purification by SEC with co-expressed AaEnc, negative stain TEM analysis, and  
 280 native polyacrylamide gel electrophoresis (PAGE) (**Figure 6a**, **Figure 6b**, and **Figure 6c**). Next, the

281 fluorescence of equimolar amounts of free eGFP and AaEnc-encapsulated eGFP-TP were compared  
282 across a range of pH values from pH 3.0 to 8.0 using a plate-based fluorescence assay (**Figure 6d**). Both  
283 free eGFP and AaEnc-encapsulated eGFP-TP yielded very similar sigmoidal fluorescence response curves,  
284 demonstrating that the interior pH of AaEnc is not appreciably different from the bulk pH. Further,  
285 encapsulation within AaEnc does apparently not alter cargo pH sensitivity to a significant degree. These  
286 results indicate that the AaEnc shell does not represent an effective diffusion barrier for protons. Thus,  
287 buffer pH changes will result in the rapid equilibration of the external and luminal pH. Similar behavior  
288 has been observed for other protein-based compartments, particularly the carbon-fixing carboxysome  
289 bacterial microcompartment.<sup>45</sup> Stopped-flow pH colorimetry indicated a rapid equilibration of the  
290 luminal carboxysome pH to that of the bulk solvent highlighting the porosity of the carboxysome shell  
291 towards protons. However, considering that one of the likely primary functions of encapsulin and  
292 carboxysome shells is to control the flux of specific small molecules into and out of the shell interior<sup>45,46</sup>  
293 – possibly through the action of dynamic or gated pores – the idea that protein shells could be able to  
294 control the passage of protons is not out of the realm of possibility. A molecular mechanism similar to  
295 that employed by aquaporins, which allow passage of water molecules but block proton flux, could  
296 certainly exist or be engineered in protein shells.<sup>47</sup>

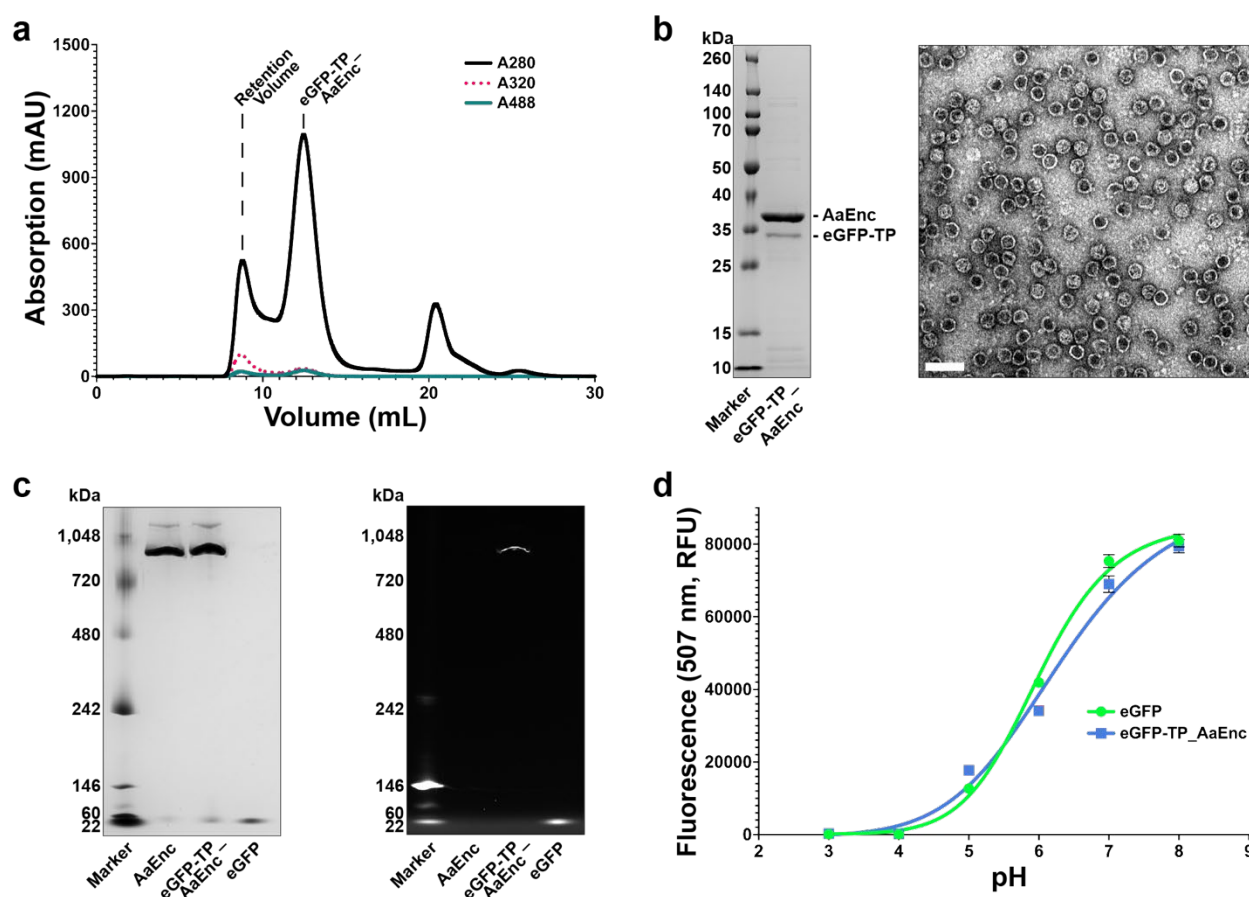

297

298 **Figure 6.** Analysis of eGFP cargo-loaded AaEnc. **a**) Size exclusion chromatography (SEC) analysis of AaEnc-encapsulated eGFP  
299 showing elution at 12-13 mL via protein absorbance at 280 nm and specific eGFP absorbance at 488 nm. **b**) SDS-PAGE analysis  
300 of purified eGFP-loaded AaEnc (left) and negative stain TEM (right). Scale bar: 50 nm. **c**) Native PAGE gel analysis of empty

301 AaEnc, eGFP-loaded AaEnc, and free eGFP (left) along with corresponding fluorescence analysis of the same gel highlighting co-  
302 elution of eGFP fluorescence with the high molecular weight encapsulin band (right). **d**) Plate-based fluorescence analysis of  
303 AaEnc-encapsulated eGFP (eGFP-TP AaEnc) versus free eGFP. Data shown as means with error bars representing standard  
304 deviations from three independent experiments.

305

## 306 **Conclusion**

307 The large number of encapsulin systems distributed across diverse bacterial and archaeal phyla –  
308 including many extremophiles – represents a largely untapped source of novel biotechnological tools.<sup>4</sup>  
309 Ongoing discoveries and research within the encapsulin field has resulted in the characterization of  
310 many nano-encapsulation systems with a quickly expanding and diverse list of useful molecular  
311 features.<sup>10,11,14,18,28</sup> However, relatively little attention has been focused on systematically exploring  
312 encapsulins from extremophilic bacteria and archaea with unusual molecular characteristics and  
313 stability profiles. With this study, we have taken the first step towards addressing this issue with a focus  
314 on the acid stability of the AaEnc nanocage.

315 Our results highlight the difficulty of pinpointing specific protein characteristics that lead to increased  
316 acid stability. Beyond the previously reported observation that acid stable proteins contain an increased  
317 number of aspartate and glutamate residues, resulting in a low pI,<sup>48</sup> no other adaptations towards acid  
318 stability are readily apparent for AaEnc. We find that at the protomer level, AaEnc does not display any  
319 obvious properties beyond a low pI, that would indicate exceptionally high acid stability. This analysis is  
320 necessarily purely computational as encapsulin protomers quickly self-assemble to form protein  
321 nanocages and cannot be studied in isolation. It seems likely that the formation of a large 60mer protein  
322 complex plays a role in the acid tolerance of AaEnc with some assembled shells still present after  
323 extended incubation at pH 1.9. It can be speculated that minimizing the number of ionizable groups at  
324 key subunit interfaces within the AaEnc shell would contribute towards its stability at low pH. Beyond its  
325 unusual acid tolerance, AaEnc exhibits the unique feature of seemingly pH-dependent all “closed” or all  
326 “open” 5-fold pore states. At physiological pH, the “closed” and “open” states exist in a ratio of 2:1,  
327 whereas at low pH, the equilibrium is completely shifted towards the “closed” state. This behavior likely  
328 has important functional and biological implications and will require further study. Its stability, pH-  
329 responsive pores, and the fact that the “open” pore state with a diameter of 20 Å represents the largest  
330 encapsulin pore reported to date, make AaEnc an interesting target for future nanocage engineering  
331 applications in catalysis, nanotechnology, and medicine.

332 Specifically, acid-tolerant protein cages could offer novel opportunities in nanoreactor design and  
333 engineering, particularly in the context of industrial biopolymer degradation which requires acidic  
334 conditions. Enzyme encapsulation or co-localization could improve the performance of enzymes like  
335 chymosins,<sup>49</sup> dye-decolorizing peroxidases,<sup>50</sup> glucoamylases,<sup>51</sup> and proteases,<sup>52</sup> already extensively used  
336 in the food industry, agriculture, and biofuel production.<sup>53-56</sup> Further, bioleaching and bioremediation  
337 approaches aimed at recovering valuable or toxic metals could benefit from acid stable nano-  
338 encapsulation systems able to sequester specific metal-binding enzymes of interest.<sup>24,57</sup> Finally, a  
339 number of biomedical applications of protein nanocages related to drug delivery or intracellular

340 targeting of acidic compartments could also benefit from robust and easily engineerable nanocages like  
341 AaEnc.<sup>58,59</sup>

342 In sum, AaEnc is the first characterized highly acid stable encapsulin nanocage with a unique pH-  
343 dependent dynamic pore and, therefore, represents a novel useful tool for the nanocage engineering  
344 community.

345

## 346 **Methods**

### 347 Chemicals and biological materials

348 All chemicals were used as supplied by vendors without further purification. Imidazole, Invitrogen Novex  
349 WedgeWell 14% tris-glycine Mini Protein Gels, Isopropyl- $\beta$ -D-thiogalactopyranoside (IPTG), lysozyme,  
350 NativePAGE™ 4 to 16% bis-tris Mini Protein Gels, NativeMark Unstained Protein Standard, Spectra™  
351 Multicolor Broad Range Protein Ladder, Thermo Scientific Pierce 660 nm Protein Assay Reagent, Tris  
352 base, Tris HCl, all restriction enzymes, and all cell culture media and reagents were purchased from  
353 Fisher Scientific, Inc. (USA). Gibson Assembly Master Mix was purchased from NEB (USA). Amicon Ultra-  
354 0.5 mL centrifugal units and Benzonase® nuclease were purchased from MilliporeSigma (USA). BL21  
355 (DE3) Electrocompetent Cells used for *E. coli* expression were also purchased from MilliporeSigma (USA).  
356 Bis-tris propane from Research Products International (USA) was used for the assembly buffer. Ni-NTA  
357 agarose from Gold Biotechnology, Inc. (USA) was used for His-tagged protein purification.

### 358 Instrumentation

359 Cell lysis was conducted via sonication with a Model 120 Sonic Dismembrator from Fisher Scientific, Inc.  
360 (USA). Protein was quantified on a Nanodrop Spectrophotometer from ThermoFisher Scientific, Inc.  
361 (USA). Protein purification was carried out on an AKTA Pure fast liquid protein chromatography system;  
362 size exclusion chromatography (SEC) was carried out with a HiPrep 16/60 Sephacryl S-500 HR and  
363 Superose 6 10/300 GL columns (Cytiva, USA); anion exchange was carried out with a HiTrap Q FF column  
364 (Cytiva, USA). Polyacrylamide gel electrophoresis (PAGE) and NativePAGE were performed in an XCell  
365 SureLock from Invitrogen/ThermoFisher Scientific (USA). Gel images were captured using a ChemiDoc  
366 Imaging System from Bio-Rad Laboratories, Inc. (USA). DLS was carried out on an Uncle from Unchained  
367 Labs (USA). TEM was carried out on a Morgagni 100 keV Transmission Electron Microscope (FEI, USA).  
368 Plate-based fluorescence assays were conducted on the Synergy H1 Microplate Reader from BioTek  
369 Instruments (USA). EM grid glow discharging was conducted with a PELCO easiGlow™ system by Ted  
370 Pella, Inc (USA). A Talos Arctica Cryo Transmission Electron Microscope by ThermoScientific, Inc. (USA)  
371 equipped with a K2 Summit direct electron detector by Gatan, Inc. (USA) located at the University of  
372 Michigan Life Sciences Institute was used for cryo-EM. Smaller materials are listed along with  
373 corresponding methods below.

### 374 Software

375 The following software was used throughout this work: Adobe Illustrator 2021 v25.0.0 (figures),  
376 cryoSPARC v3.3.1<sup>60</sup> (cryo electron microscopy), Fiji/ImageJ v2.1.0/1.53c<sup>61</sup> (densitometric data analysis)

377 and TEM images), GraphPad Prism for Mac OS v9.4.0 (chromatography, melting  
378 temperature/aggregation, and fluorescence graphs), Bio-Rad Image Lab Touch Software (gel imaging),  
379 Microsoft Excel for Mac v16.46 (DLS graphs), Phenix v1.19.2-4158<sup>62</sup> (model building), UCSF Chimera  
380 v1.16<sup>63</sup> and ChimeraX v3<sup>39</sup> (cryo-EM density and model visualization), and UNICORN 7 (FPLC system  
381 control and chromatography). Online software suites or tools are listed along with corresponding  
382 methods below.

### 383 Bioinformatic search for acid-stable encapsulins

384 A curated list of Family 1 encapsulins<sup>19</sup> was sorted according to molecular weight, removing any entries  
385 falling below 25 kDa or above 35 kDa to remove partial annotations and fusion encapsulins, respectively.  
386 Results were then processed via the ExPasy Compute pI/MW tool  
387 ([https://web.expasy.org/compute\\_pi/](https://web.expasy.org/compute_pi/)). Data was then organized according to calculated pI and binned  
388 for histogram analysis or plotted for scatterplot analysis via GraphPad Prism.

### 389 Sequence alignments

390 Encapsulin alignments were generated with the ESPript 3 server (<http://esript.ibcp.fr/>) using a protein  
391 sequence alignment produced with Clustal Omega, with secondary structure information based on the  
392 TmEnc structure (PDB 3DKT; **Figure S1**) or the “open” and “closed” AaEnc structures (**Figure S5**).<sup>38,64</sup>

### 393 Protein production

394 For all target proteins, plasmids were constructed with target *E. coli* codon-optimized gBlock genes,  
395 synthesized by IDT (USA), inserted into the pETDuet-1 vector via Gibson assembly using the NdeI and  
396 PacI restriction sites (**Table S2**). *E. coli* BL21 (DE3) was transformed with the respective plasmids via  
397 electroporation per protocol and 25% glycerol bacterial stocks were made and stored at -80°C until  
398 further use. Starter cultures were grown in 5 mL LB with 100 mg/mL ampicillin at 37°C overnight. For all  
399 constructs, 500 mL of LB with ampicillin was inoculated with overnight starter cultures and grown at  
400 37°C to an OD<sub>600</sub> of 0.4-0.5, then induced with 0.1 mM IPTG and grown further at 30°C overnight for  
401 ca. 18 h. Cells were then harvested via centrifugation at 10,000 rcf for 15 minutes at 4°C and pellets  
402 were frozen and stored at -80°C until further use.

### 403 Protein purification

404 Frozen bacterial pellets were thawed on ice and resuspended in 5 mL/g (wet cell mass) of cold Tris  
405 Buffered Saline (20 mM Tris pH 7.5, 150 mM NaCl). Lysis components were added (0.5 mg/mL lysozyme,  
406 1 mM tris(2-carboxyethyl)phosphine [TCEP], one SIGMAFAST EDTA-free protease inhibitor cocktail tablet  
407 per 100 mL, 0.5 mM MgCl<sub>2</sub>, and 25 units/mL Benzonase® nuclease) and samples were lysed on ice for 10  
408 min. Samples were then sonicated at 60% amplitude for 5 min total (eight seconds on, 16 seconds off)  
409 until no longer viscous. After sonication, samples were centrifuged at 8,000 rcf for 15 minutes at 4°C.  
410 Samples were then subjugated to 10% polyethylene glycol (PEG) 8000 precipitation (lysate brought to  
411 10% PEG 8K and 500 mM NaCl and incubated for 30 minutes on ice, then centrifuged 8,000 rcf for 15  
412 min). Supernatant was discarded and the pellet was resuspended in 5 mL TBS pH 7.5 and filtered using a  
413 0.22 µm syringe filter (Corning, USA). The protein sample was then loaded on an AKTA Pure and purified



414 via a Sephacryl S-500 column. Sample fractions were pooled and buffer exchanged into AIEX Buffer (20  
415 mM Tris pH 7.5) and loaded onto an AKTA Pure, then purified via HiTrap Q-FF by linear gradient into  
416 AIEX Buffer with 1M NaCl. Sample flow-through was collected and centrifuged at 10,000 rcf for 10 min,  
417 then loaded on an AKTA Pure for final purification via a Superose 6 10/300 GL column pre-equilibrated  
418 with TBS pH 7.5. All proteins were stored at 4°C until use.

419 For free His-tagged eGFP purification, the sample was lysed as above in NTA Resuspension Buffer (50  
420 mM Tris pH 8.0, 150 mM NaCl, 1 mM TCEP, 10 mM imidazole, and 5% glycerol). Lysate was bound to Ni-  
421 NTA resin pre-equilibrated with NTA Resuspension Buffer via rocking at 4°C for 45 minutes. Supernatant  
422 was discarded and the bound sample was washed once with NTA Resuspension Buffer and a second  
423 time with NTA Resuspension Buffer with 20 mM imidazole. Free His-tagged eGFP was then eluted three  
424 times with Elution Buffer (50 mM Tris pH 8.0, 150 mM NaCl, 1 mM TCEP, 350 mM imidazole, 5%  
425 glycerol) and stored at 4°C for future use.

#### 426 Transmission electron microscopy

427 Samples were diluted to 0.1-0.3 mg/mL and buffer exchanged into various buffers ranging from pH 1.5  
428 to pH 10.0 (**Figure 2c** and **Figure S2**) via five successive exchanges in 100 kDa MWCO Amicon Ultra-0.5  
429 mL centrifugal units. Buffers used consisted of 50 mM sodium phosphate and 150 mM NaCl, pH 1.5; 50  
430 mM sodium phosphate and 150 mM NaCl, pH 1.9; 50 mM sodium phosphate and 150 mM NaCl, pH 2.1;  
431 50 mM sodium phosphate and 150 mM NaCl, pH 2.25; 50 mM sodium phosphate and 150 mM NaCl, pH  
432 3.0; 50 mM sodium citrate and 150 mM NaCl, pH 5.0; 50 mM MES and 150 mM NaCl, pH 6.0; 50 mM bis-  
433 tris propane and 150 mM NaCl, pH 9.0; and 50 mM CHES and 150 mM NaCl, pH 10.0. Samples were  
434 incubated at 4°C for six hours, and then immediately stained and imaged. Additional pH 2.25 and pH 3.0  
435 samples were stored at 4°C for two days and stained and imaged. Negative stain transmission electron  
436 microscopy (TEM) was carried out on the various samples with 200-mesh gold grids coated with extra  
437 thick (25-50 nm) formvar-carbon film (EMS, USA) made hydrophilic by glow discharging at 5 mA for 60 s.  
438 Briefly, 3.5 µL of sample was added to the grid and incubated for 30 seconds, wicked with filter paper,  
439 and washed once with distilled water and once with 0.75% (w/v) uranyl formate before staining with 8.5  
440 µL of uranyl formate for 30 seconds. TEM images were captured using a Morgagni transmission electron  
441 microscope at 100 keV at the University of Michigan Life Sciences Institute. For all TEM experiments,  
442 samples were roughly 0.2 mg/mL of AaEnc monomer in appropriate buffer.

#### 443 Dynamic and static light scattering analyses

444 All sizing and polydispersity measurements were carried out on an Uncle by Unchained Labs (USA) at 30  
445 °C in triplicate. Purified AaEnc samples were adjusted to 0.4 mg/mL of monomer in the appropriate  
446 corresponding buffers and centrifuged at 10,000 rcf for 10 min, then immediately analyzed via DLS  
447 (**Figure 2b**). Static light scattering aggregation temperature ( $T_{agg}$ ) analysis was then conducted on  
448 similarly prepared samples over a 25°C to 95°C ramp at 1°C per minute (**Figure 2d**).

#### 449 Protease assays

450 AaEnc and bovine serum albumin (BSA; ThermoScientific Pierce, USA) were individually buffer  
451 exchanged into Pepsin Assay Buffer (50 mM Na<sub>2</sub>PO<sub>4</sub>, 150 mM NaCl, pH 3.0) and mixed in a 40:1 molar

452 ratio with commercially purchased pepsin protease (Promega, USA), then incubated at 37°C for 3 h and  
453 frozen until later use. Purified AaEnc and BSA were individually buffer exchanged into TBS pH 7.5 and  
454 mixed in a 40:1:1 molar ratio with commercially purchased trypsin (Promega, USA) and chymotrypsin  
455 (Promega, USA), then incubated at 37°C for 8 h and frozen until later use. All samples were then rapidly  
456 thawed and examined via PAGE analysis.

#### 457 Cryo-electron microscopy

##### 458 *Sample preparation*

459 The purified protein samples were concentrated to 3 mg/mL in 150 mM NaCl, 20 mM Tris pH 7.5 or 150  
460 mM NaCl, 50 mM Na<sub>2</sub>PO<sub>4</sub> pH 3.0. 3.5 µL of protein samples were applied to freshly glow discharged  
461 Quantifoil R1.2/1.3 grids and plunged into liquid ethane using an FEI Vitrobot Mark IV (100% humidity,  
462 22°C, blot force 20, blot time 4 seconds, drain time 0 seconds, wait time 0 seconds). The frozen grids  
463 were clipped and stored in liquid nitrogen until data collection.

##### 464 *Data collection*

465 Cryo-electron microscopy movies were collected using a ThermoFisher Scientific Talos Arctica operating  
466 at 200 keV equipped with a Gatan K2 Summit direct electron detector. Movies were collected at 45,000x  
467 magnification using the Legikon<sup>65</sup> software package with a pixel size of 0.91 Å/pixel and an exposure  
468 time of 5 or 8 s, frame time of 200 ms, and total dose of 42 e<sup>-</sup>/Å<sup>2</sup> for the pH 3.0 sample and 41 e<sup>-</sup>/Å<sup>2</sup> for  
469 the pH 7.5 sample. 1,357 movies were collected for the pH 3 sample and 975 movies were collected for  
470 the pH 7.5 sample.

##### 471 *Data processing*

472 pH 7.5 sample: All data processing was performed using cryoSPARC v3.3.1.<sup>60</sup> 975 Movies were imported  
473 and motion corrected using Patch Motion Correction and CTF fits were refined using Patch CTF. 821  
474 movies with CTF fits better than 8.0 Å were selected for downstream processing. Roughly 200 particles  
475 were picked manually using Manual Picker and grouped into 10 classes using 2D Classification. Well  
476 resolved classes were selected and used as templates for Template Picker to pick particles with a  
477 specified particle diameter of 240 Å. 56,583 particles with a box size of 384 pixels were extracted and  
478 subjected to 3 rounds of 2D Classification with 100 classes yielding 44,686 particles in good classes. Ab-  
479 Initio Reconstruction with 6 classes and I symmetry was carried out next. The two main classes were  
480 selected representing the all “closed” (29,056 particles) and all “open” (13,581 particles) states. Particles  
481 from each respective state were used as inputs for separate Homogenous Refinement jobs (with I or C1  
482 symmetry) with the following settings: optimize per-particle defocus, optimize per-group CTF params,  
483 and Ewald Sphere correction enabled. The I refinements yielded a 2.90 Å density for the “closed” state,  
484 and a 3.32 Å density for the “open” state, whereas the C1 refinements resulted in 4.84 Å and 4.44 Å  
485 maps, respectively (**Figure S3**). 3D Variability Analysis with 3 components was carried out on both  
486 particle sets using the C1 Refinement results as inputs, however, no components could be resolved  
487 corresponding to “open” and “closed” states within the same density.

488 pH 3.0 sample: The same preprocessing procedure was used as for the pH 7.5 sample yielding 52,210  
489 extracted particles with a box size of 384 pixels. 3 rounds of 2D classification with 100 classes resulted in  
490 47,599 good particles. Ab-Initio Reconstruction with 6 classes and I symmetry was carried out yielding  
491 one dominant class containing 47,164 particles. This was followed by I and C1 Homogenous Refinement  
492 jobs using the following parameters: optimized per-particle defocus, optimize per-group CTF params,  
493 and Ewald Sphere correction. The I refinement resulted in a density of 2.77 Å while the C1 refinement  
494 yielded a 4.12 Å map (**Figure S7**).

#### 495 *Model building*

496 A homology model was generated using RoseTTAFold<sup>66</sup> on the Robetta server and was used as a starting  
497 model for all model building efforts. This starting model was manually placed into the respective cryo-  
498 EM maps using Chimera v1.16,<sup>63</sup> and was further fit using the Fit to Volume command. The placed  
499 monomeric models were then manually refined against the respective cryo-EM maps using Coot  
500 v8.9.6.<sup>67</sup> The resulting models were further refined using Real Space Refine in Phenix v 1.19.2-4158<sup>68</sup>  
501 with default settings and three iterations. After inspecting the refined models in Coot, symmetry  
502 restraints were pulled from the maps using the Phenix.Find\_NCS\_from\_Map command with I symmetry.  
503 Complete shell models were assembled using the Phenix.Build\_from\_NCS command. These shell models  
504 were then used as inputs for a final round of Real Space Refine with NCS restraints, 3 iterations, and all  
505 other settings set to default. The models were deposited to the PDB under PDB ID 8DN9, 8DNL, and  
506 8DNA; and the EMDB under EMD-27558, EMD-27573, and EMD-27560.

#### 507 Computational electrostatics and solvation analyses

508 *In silico* hydrogen bonding and buriedness analyses were conducted using the APBS-PDB2PQR software  
509 suite (<https://server.poissonboltzmann.org/pdb2pqr>) with PROPKA v3.2 to predict pKa values and assign  
510 protonation states at the provided pH values. Analyses were conducted using the “closed” and “open”  
511 state AaEnc structures at pH 7.5 as well as the “closed” AaEnc structure at pH 3.0. The AaEnc protomer  
512 was further analyzed using APBS-PDB2PQR to assess the calculated surface charge of AaEnc across  
513 various pH values from pH 2.0 to pH 8.0 (**Figure 5a**).<sup>40</sup> Calculated protomer charge and stability  
514 heatmaps were generated with the Protein-Sol webtool (<https://protein-sol.manchester.ac.uk/heatmap>) using the AaEnc protomer from the “closed” state at pH 7.5 as the input  
515 (**Figure 5b** and **Figure 5c**).<sup>41</sup> Monomer structure alignments were carried out in ChimeraX.<sup>39</sup>

#### 517 In vivo cargo loading, native PAGE, and fluorescence analysis

518 The AaEnc encapsulated eGFP-TP sample was co-expressed, purified, and analyzed via TEM in the same  
519 manner as AaEnc as described above (**Figure 6a** and **Figure 6b**). The free His-tagged eGFP and the  
520 AaEnc-encapsulated eGFP-TP samples were concentrated to equimolar concentrations as determined by  
521 densitometric analysis via SDS-PAGE using Fiji/ImageJ.<sup>61</sup> Empty AaEnc and eGFP-TP-loaded AaEnc were  
522 similarly concentrated to equimolar concentrations for comparative NativePAGE analysis.

523 All NativePAGE analyses were conducted in an Invitrogen XCell SureLock using NativePAGE™ 4 to 16%  
524 bis-tris mini protein gels and NativeMark Unstained Protein Standard from Fisher Scientific (USA) with 1x  
525 running buffer made from 10x Tris/Glycine Buffer from Bio-Rad Laboratories, Inc. (USA). 20 µg of protein

526 was loaded per well, with effort to maintain equivalent amounts across all lanes for comparative  
527 analysis. NativePAGE gels were run overnight at 65 V for 16.5 hours at 4°C. The following day, gels were  
528 imaged via fluorescence imaging on a ChemiDoc Imaging System by Bio-Rad Laboratories, Inc. (USA),  
529 then stained with ReadyBlue™ Protein Gel Stain from Sigma-Aldrich (USA) and imaged and analyzed.

530 His-tagged eGFP and AaEnc-encapsulated eGFP-TP were buffer exchanged into varying pH buffers from  
531 pH 3.0 to pH 8.0 via five successive exchanges in 100 kDa MWCO Amicon Ultra-0.5 mL centrifugal units  
532 and incubated at 22°C for three hours. Endpoint eGFP fluorescence (488 nm/507 nm) was then  
533 measured in a BioTek Synergy H1 microplate reader at a final volume of 100 µL in Corning® 96-well flat  
534 clear bottom black polystyrene microplates (**Figure 6c**).

## 535 References

- 536 1 Cornejo, E., Abreu, N. & Komeili, A. Compartmentalization and organelle formation in  
537 bacteria. *Curr Opin Cell Biol* **26**, 132-138 (2014).  
538 [https://doi.org:10.1016/j.ceb.2013.12.007](https://doi.org/10.1016/j.ceb.2013.12.007)
- 539 2 Sutter, M. *et al.* Structural basis of enzyme encapsulation into a bacterial  
540 nanocompartment. *Nat Struct Mol Biol* **15**, 939-947 (2008).  
541 [https://doi.org:10.1038/nsmb.1473](https://doi.org/10.1038/nsmb.1473)
- 542 3 Jones, J. A. & Giessen, T. W. Advances in encapsulin nanocompartment biology and  
543 engineering. *Biotechnol Bioeng* (2020). [https://doi.org:10.1002/bit.27564](https://doi.org/10.1002/bit.27564)
- 544 4 Andreas, M. P. & Giessen, T. W. Large-scale computational discovery and analysis of  
545 virus-derived microbial nanocompartments. *Nat Commun* **12**, 4748 (2021).  
546 [https://doi.org:10.1038/s41467-021-25071-y](https://doi.org/10.1038/s41467-021-25071-y)
- 547 5 Contreras, H. *et al.* Characterization of a Mycobacterium tuberculosis nanocompartment  
548 and its potential cargo proteins. *J Biol Chem* **289**, 18279-18289 (2014).  
549 [https://doi.org:10.1074/jbc.M114.570119](https://doi.org/10.1074/jbc.M114.570119)
- 550 6 Giessen, T. W. & Silver, P. A. Widespread distribution of encapsulin nanocompartments  
551 reveals functional diversity. *Nat Microbiol* **2**, 17029 (2017).  
552 [https://doi.org:10.1038/nmicrobiol.2017.29](https://doi.org/10.1038/nmicrobiol.2017.29)
- 553 7 McHugh, C. A. *et al.* A virus capsid-like nanocompartment that stores iron and protects  
554 bacteria from oxidative stress. *EMBO J* **33**, 1896-1911 (2014).  
555 [https://doi.org:10.15252/embj.201488566](https://doi.org/10.15252/embj.201488566)
- 556 8 He, D. *et al.* Structural characterization of encapsulated ferritin provides insight into iron  
557 storage in bacterial nanocompartments. *Elife* **5** (2016).  
558 [https://doi.org:10.7554/eLife.18972](https://doi.org/10.7554/eLife.18972)
- 559 9 He, D. *et al.* Conservation of the structural and functional architecture of encapsulated  
560 ferritins in bacteria and archaea. *Biochem J* **476**, 975-989 (2019).  
561 [https://doi.org:10.1042/BCJ20180922](https://doi.org/10.1042/BCJ20180922)
- 562 10 Giessen, T. W. *et al.* Large protein organelles form a new iron sequestration system with  
563 high storage capacity. *Elife* **8** (2019). [https://doi.org:10.7554/eLife.46070](https://doi.org/10.7554/eLife.46070)
- 564 11 Nichols, R. J. *et al.* Discovery and characterization of a novel family of prokaryotic  
565 nanocompartments involved in sulfur metabolism. *Elife* **10** (2021).  
566 [https://doi.org:10.7554/eLife.59288](https://doi.org/10.7554/eLife.59288)

- 567 12 Giessen, T. W. & Silver, P. A. Converting a Natural Protein Compartment into a  
568 Nanofactory for the Size-Constrained Synthesis of Antimicrobial Silver Nanoparticles.  
569 *ACS Synth Biol* **5**, 1497-1504 (2016). [https://doi.org:10.1021/acssynbio.6b00117](https://doi.org/10.1021/acssynbio.6b00117)
- 570 13 Sigmund, F. *et al.* Bacterial encapsulins as orthogonal compartments for mammalian cell  
571 engineering. *Nat Commun* **9**, 1990 (2018). [https://doi.org:10.1038/s41467-018-04227-3](https://doi.org/10.1038/s41467-018-04227-3)
- 572 14 Jenkins, M. C. & Lutz, S. Encapsulin Nanocontainers as Versatile Scaffolds for the  
573 Development of Artificial Metabolons. *ACS Synth Biol* **10**, 857-869 (2021).  
574 [https://doi.org:10.1021/acssynbio.0c00636](https://doi.org/10.1021/acssynbio.0c00636)
- 575 15 Moon, H., Lee, J., Min, J. & Kang, S. Developing genetically engineered encapsulin  
576 protein cage nanoparticles as a targeted delivery nanoplatform. *Biomacromolecules* **15**,  
577 3794-3801 (2014). [https://doi.org:10.1021/bm501066m](https://doi.org/10.1021/bm501066m)
- 578 16 Choi, B. *et al.* Effective Delivery of Antigen-Encapsulin Nanoparticle Fusions to  
579 Dendritic Cells Leads to Antigen-Specific Cytotoxic T Cell Activation and Tumor  
580 Rejection. *ACS Nano* **10**, 7339-7350 (2016). [https://doi.org:10.1021/acsnano.5b08084](https://doi.org/10.1021/acsnano.5b08084)
- 581 17 Altenburg, W. J., Rollins, N., Silver, P. A. & Giessen, T. W. Exploring targeting peptide-  
582 shell interactions in encapsulin nanocompartments. *Sci Rep* **11**, 4951 (2021).  
583 [https://doi.org:10.1038/s41598-021-84329-z](https://doi.org/10.1038/s41598-021-84329-z)
- 584 18 Jones, J. A., Cristie-David, A. S., Andreas, M. P. & Giessen, T. W. Triggered Reversible  
585 Disassembly of an Engineered Protein Nanocage\*. *Angew Chem Int Ed Engl* **60**, 25034-  
586 25041 (2021). [https://doi.org:10.1002/anie.202110318](https://doi.org/10.1002/anie.202110318)
- 587 19 Adamson, L. S. R. *et al.* Pore structure controls stability and molecular flux in engineered  
588 protein cages. *Sci Adv* **8**, eabl7346 (2022). [https://doi.org:10.1126/sciadv.abl7346](https://doi.org/10.1126/sciadv.abl7346)
- 589 20 Williams, E. M., Jung, S. M., Coffman, J. L. & Lutz, S. Pore Engineering for Enhanced  
590 Mass Transport in Encapsulin Nanocompartments. *ACS Synth Biol* **7**, 2514-2517 (2018).  
591 [https://doi.org:10.1021/acssynbio.8b00295](https://doi.org/10.1021/acssynbio.8b00295)
- 592 21 Putri, R. M. *et al.* Structural Characterization of Native and Modified Encapsulins as  
593 Nanoplatforms for in Vitro Catalysis and Cellular Uptake. *ACS Nano* **11**, 12796-12804  
594 (2017). [https://doi.org:10.1021/acsnano.7b07669](https://doi.org/10.1021/acsnano.7b07669)
- 595 22 Sharma, A., Kawarabayasi, Y. & Satyanarayana, T. Acidophilic bacteria and archaea:  
596 acid stable biocatalysts and their potential applications. *Extremophiles* **16**, 1-19 (2012).  
597 [https://doi.org:10.1007/s00792-011-0402-3](https://doi.org/10.1007/s00792-011-0402-3)
- 598 23 Rohwerder, T., Gehrke, T., Kinzler, K. & Sand, W. Bioleaching review part A: progress  
599 in bioleaching: fundamentals and mechanisms of bacterial metal sulfide oxidation. *Appl*  
600 *Microbiol Biotechnol* **63**, 239-248 (2003). [https://doi.org:10.1007/s00253-003-1448-7](https://doi.org/10.1007/s00253-003-1448-7)
- 601 24 Pande, V., Pandey, S. C., Sati, D., Bhatt, P. & Samant, M. Microbial Interventions in  
602 Bioremediation of Heavy Metal Contaminants in Agroecosystem. *Front Microbiol* **13**,  
603 824084 (2022). [https://doi.org:10.3389/fmicb.2022.824084](https://doi.org/10.3389/fmicb.2022.824084)
- 604 25 Reed, C. J., Lewis, H., Trejo, E., Winston, V. & Evilia, C. Protein adaptations in archaeal  
605 extremophiles. *Archaea* **2013**, 373275 (2013). [https://doi.org:10.1155/2013/373275](https://doi.org/10.1155/2013/373275)
- 606 26 Dumorné, K., Córdova, D. C., Astorga-Eló, M. & Renganathan, P. Extremozymes: A  
607 Potential Source for Industrial Applications. *J Microbiol Biotechnol* **27**, 649-659 (2017).  
608 [https://doi.org:10.4014/jmb.1611.11006](https://doi.org/10.4014/jmb.1611.11006)
- 609 27 Giessen, T. W. Encapsulins. *Annu Rev Biochem* (2022). [https://doi.org:10.1146/annurev-biochem-040320-102858](https://doi.org/10.1146/annurev-biochem-040320-102858)
- 610

- 611 28 Rodríguez, J. M., Allende-Ballester, C., Cornelissen, J. J. L. M. & Castón, J. R.  
612 Nanotechnological Applications Based on Bacterial Encapsulins. *Nanomaterials (Basel)*  
613 **11** (2021). <https://doi.org/10.3390/nano11061467>
- 614 29 Shrestha, R., Huang, G., Meekins, D. A., Geisbrecht, B. V. & Li, P. Mechanistic Insights  
615 into Dye-Decolorizing Peroxidase Revealed by Solvent Isotope and Viscosity Effects.  
616 *ACS Catal* **7**, 6352-6364 (2017). <https://doi.org/10.1021/acscatal.7b01861>
- 617 30 Baker-Austin, C. & Dopson, M. Life in acid: pH homeostasis in acidophiles. *Trends*  
618 *Microbiol* **15**, 165-171 (2007). <https://doi.org/10.1016/j.tim.2007.02.005>
- 619 31 Guan, N. *et al.* Understanding of how Propionibacterium acidipropionici respond to  
620 propionic acid stress at the level of proteomics. *Sci Rep* **4**, 6951 (2014).  
621 <https://doi.org/10.1038/srep06951>
- 622 32 Parizzi, L. P. *et al.* The genome sequence of Propionibacterium acidipropionici provides  
623 insights into its biotechnological and industrial potential. *BMC Genomics* **13**, 562 (2012).  
624 <https://doi.org/10.1186/1471-2164-13-562>
- 625 33 Hsu, S. T. & Yang, S. T. Propionic acid fermentation of lactose by Propionibacterium  
626 acidipropionici: effects of pH. *Biotechnol Bioeng* **38**, 571-578 (1991).  
627 <https://doi.org/10.1002/bit.260380603>
- 628 34 Ross, J. *et al.* Pore dynamics and asymmetric cargo loading in an encapsulin  
629 nanocompartment. *Sci Adv* **8**, eabj4461 (2022). <https://doi.org/10.1126/sciadv.abj4461>
- 630 35 Tang, Y. *et al.* Cryo-EM structure of Mycobacterium smegmatis DyP-loaded encapsulin.  
631 *Proc Natl Acad Sci U S A* **118** (2021). <https://doi.org/10.1073/pnas.2025658118>
- 632 36 Loncar, N., Rozeboom, H. J., Franken, L. E., Stuart, M. C. A. & Fraaije, M. W. Structure  
633 of a robust bacterial protein cage and its application as a versatile biocatalytic platform  
634 through enzyme encapsulation. *Biochem Biophys Res Commun* **529**, 548-553 (2020).  
635 <https://doi.org/10.1016/j.bbrc.2020.06.059>
- 636 37 Ross, J. *et al.* Pore dynamics and asymmetric cargo loading in an encapsulin  
637 nanocompartment. *Sci Adv* **8**, eabj4461 (2022). <https://doi.org/10.1126/sciadv.abj4461>
- 638 38 Robert, X. & Gouet, P. Deciphering key features in protein structures with the new  
639 ENDscript server. *Nucleic Acids Res* **42**, W320-324 (2014).  
640 <https://doi.org/10.1093/nar/gku316>
- 641 39 Goddard, T. D. *et al.* UCSF ChimeraX: Meeting modern challenges in visualization and  
642 analysis. *Protein Sci* **27**, 14-25 (2018). <https://doi.org/10.1002/pro.3235>
- 643 40 Jurrus, E. *et al.* Improvements to the APBS biomolecular solvation software suite.  
644 *Protein Sci* **27**, 112-128 (2018). <https://doi.org/10.1002/pro.3280>
- 645 41 Hebditch, M. & Warwicker, J. Web-based display of protein surface and pH-dependent  
646 properties for assessing the developability of biotherapeutics. *Sci Rep* **9**, 1969 (2019).  
647 <https://doi.org/10.1038/s41598-018-36950-8>
- 648 42 Kamiyama, D. *et al.* Versatile protein tagging in cells with split fluorescent protein. *Nat*  
649 *Commun* **7**, 11046 (2016). <https://doi.org/10.1038/ncomms11046>
- 650 43 Shinoda, H., Shannon, M. & Nagai, T. Fluorescent Proteins for Investigating Biological  
651 Events in Acidic Environments. *Int J Mol Sci* **19** (2018).  
652 <https://doi.org/10.3390/ijms19061548>
- 653 44 Shinoda, H. *et al.* Acid-Tolerant Monomeric GFP from *Olindias formosa*. *Cell Chem Biol*  
654 **25**, 330-338.e337 (2018). <https://doi.org/10.1016/j.chembiol.2017.12.005>

- 655 45 Menon, B. B., Heinhorst, S., Shively, J. M. & Cannon, G. C. The carboxysome shell is  
656 permeable to protons. *J Bacteriol* **192**, 5881-5886 (2010).  
657 <https://doi.org/10.1128/JB.00903-10>
- 658 46 Penrod, J. T. & Roth, J. R. Conserving a volatile metabolite: a role for carboxysome-like  
659 organelles in *Salmonella enterica*. *J Bacteriol* **188**, 2865-2874 (2006).  
660 <https://doi.org/10.1128/JB.188.8.2865-2874.2006>
- 661 47 Burykin, A. & Warshel, A. What really prevents proton transport through aquaporin?  
662 Charge self-energy versus proton wire proposals. *Biophys J* **85**, 3696-3706 (2003).  
663 [https://doi.org/10.1016/S0006-3495\(03\)74786-9](https://doi.org/10.1016/S0006-3495(03)74786-9)
- 664 48 Tokmakov, A. A., Kurotani, A. & Sato, K. I. Protein pI and Intracellular Localization.  
665 *Front Mol Biosci* **8**, 775736 (2021). <https://doi.org/10.3389/fmolb.2021.775736>
- 666 49 Lambré, C. *et al.* Safety evaluation of the food enzyme rennet paste from the abomasum  
667 of suckling goats, lambs and calves. *EFSA J* **19**, e07006 (2021).  
668 <https://doi.org/10.2903/j.efsa.2021.7006>
- 669 50 Salvachúa, D., Prieto, A., Martínez, Á. & Martínez, M. J. Characterization of a novel  
670 dye-decolorizing peroxidase (DyP)-type enzyme from *Irpex lacteus* and its application in  
671 enzymatic hydrolysis of wheat straw. *Appl Environ Microbiol* **79**, 4316-4324 (2013).  
672 <https://doi.org/10.1128/AEM.00699-13>
- 673 51 Parashar, D. & Satyanarayana, T. Engineering a chimeric acid-stable  $\alpha$ -amylase-  
674 glucoamylase (Amy-Glu) for one step starch saccharification. *Int J Biol Macromol* **99**,  
675 274-281 (2017). <https://doi.org/10.1016/j.ijbiomac.2017.02.083>
- 676 52 Razzaq, A. *et al.* Microbial Proteases Applications. *Front Bioeng Biotechnol* **7**, 110  
677 (2019). <https://doi.org/10.3389/fbioe.2019.00110>
- 678 53 Mohanty, A. K., Mukhopadhyay, U. K., Grover, S. & Batish, V. K. Bovine chymosin:  
679 production by rDNA technology and application in cheese manufacture. *Biotechnol Adv*  
680 **17**, 205-217 (1999). [https://doi.org/10.1016/s0734-9750\(99\)00010-5](https://doi.org/10.1016/s0734-9750(99)00010-5)
- 681 54 Xu, Q. S., Yan, Y. S. & Feng, J. X. Efficient hydrolysis of raw starch and ethanol  
682 fermentation: a novel raw starch-digesting glucoamylase from. *Biotechnol Biofuels* **9**, 216  
683 (2016). <https://doi.org/10.1186/s13068-016-0636-5>
- 684 55 Johnston, D. B. & McAloon, A. J. Protease increases fermentation rate and ethanol yield  
685 in dry-grind ethanol production. *Bioresour Technol* **154**, 18-25 (2014).  
686 <https://doi.org/10.1016/j.biortech.2013.11.043>
- 687 56 Li, L. *et al.* Revealing two important tryptophan residues with completely different roles  
688 in a dye-decolorizing peroxidase from *Irpex lacteus* F17. *Biotechnol Biofuels* **14**, 128  
689 (2021). <https://doi.org/10.1186/s13068-021-01978-y>
- 690 57 Wiltschi, B. *et al.* Enzymes revolutionize the bioproduction of value-added compounds:  
691 From enzyme discovery to special applications. *Biotechnol Adv* **40**, 107520 (2020).  
692 <https://doi.org/10.1016/j.biotechadv.2020.107520>
- 693 58 Theillet, F. X. *et al.* Physicochemical properties of cells and their effects on intrinsically  
694 disordered proteins (IDPs). *Chem Rev* **114**, 6661-6714 (2014).  
695 <https://doi.org/10.1021/cr400695p>
- 696 59 Li, S. S. *et al.* Monitoring the Changes of pH in Lysosomes during Autophagy and  
697 Apoptosis by Plasmon Enhanced Raman Imaging. *Anal Chem* **91**, 8398-8405 (2019).  
698 <https://doi.org/10.1021/acs.analchem.9b01250>

- 699 60 Punjani, A., Rubinstein, J. L., Fleet, D. J. & Brubaker, M. A. cryoSPARC: algorithms for  
700 rapid unsupervised cryo-EM structure determination. *Nat Methods* **14**, 290-296 (2017).  
701 [https://doi.org:10.1038/nmeth.4169](https://doi.org/10.1038/nmeth.4169)
- 702 61 Schindelin, J. *et al.* Fiji: an open-source platform for biological-image analysis. *Nat*  
703 *Methods* **9**, 676-682 (2012). <https://doi.org:10.1038/nmeth.2019>
- 704 62 Adams, P. D. *et al.* PHENIX: a comprehensive Python-based system for macromolecular  
705 structure solution. *Acta Crystallogr D Biol Crystallogr* **66**, 213-221 (2010).  
706 <https://doi.org:10.1107/S0907444909052925>
- 707 63 Pettersen, E. F. *et al.* UCSF Chimera--a visualization system for exploratory research and  
708 analysis. *J Comput Chem* **25**, 1605-1612 (2004). <https://doi.org:10.1002/jcc.20084>
- 709 64 Madeira, F. *et al.* The EMBL-EBI search and sequence analysis tools APIs in 2019.  
710 *Nucleic Acids Res* **47**, W636-W641 (2019). <https://doi.org:10.1093/nar/gkz268>
- 711 65 Suloway, C. *et al.* Automated molecular microscopy: the new Legimon system. *J Struct*  
712 *Biol* **151**, 41-60 (2005). <https://doi.org:10.1016/j.jsb.2005.03.010>
- 713 66 Baek, M. *et al.* Accurate prediction of protein structures and interactions using a three-  
714 track neural network. *Science* **373**, 871-876 (2021).  
715 <https://doi.org:10.1126/science.abj8754>
- 716 67 Emsley, P., Lohkamp, B., Scott, W. G. & Cowtan, K. Features and development of Coot.  
717 *Acta Crystallographica Section D: Biological Crystallography* **66**, 486-501 (2010).  
718 <https://doi.org:10.1107/S0907444910007493>
- 719 68 Adams, P. D. *et al.* PHENIX: A comprehensive Python-based system for macromolecular  
720 structure solution. *Acta Crystallographica Section D: Biological Crystallography* **66**,  
721 213-221 (2010). <https://doi.org:10.1107/S0907444909052925>

## 722 Acknowledgements

723 We gratefully acknowledge funding from the NIH (R35GM133325). Research reported in this publication  
724 was supported by the University of Michigan Cryo-EM Facility (U-M Cryo-EM). U-M Cryo-EM is grateful for  
725 support from the U-M Life Sciences Institute and the U-M Biosciences Initiative. Molecular graphics and  
726 analyses performed with UCSF ChimeraX, developed by the Resource for Biocomputing, Visualization, and  
727 Informatics at the University of California, San Francisco, with support from National Institutes of Health  
728 R01GM129325 and the Office of Cyber Infrastructure and Computational Biology, National Institute of  
729 Allergy and Infectious Diseases.

## 730 Author Contributions

731 J.A.J. and T.W.G. designed the project. J.A.J. conducted the laboratory experiments and negative stain  
732 transmission electron microscopy, while M.P.A. collected and analyzed cryo-EM data. J.A.J. and M.P.A.  
733 built the AaEnc structural models. J.A.J. wrote the manuscript. T.W.G. processed cryo-EM data, edited the  
734 manuscript and oversaw the project in its entirety.

## 735 Competing Interests

736 The authors declare no competing interests.

## 737 Additional Information

738 Correspondence and requests for materials should be addressed to T.W.G.
